# Supplementary material for: A novel hole extraction layer to enhance the performance of inverted organic solar cells
Source: Royal Society of Chemistry journal article supplement (doi:10.1039/c7ta08694f), 2017-01-01
Supplement: c7ta08694f1.pdf [file c7ta08694f1.pdf]

Electronic Supplementary Information for

**Novel hole extraction layer enhancing performance of inverted organic solar cells**

Dashan Qin, Huan Cao, Cenqi Yan, Shuai-Shuai Meng, Jian-Xin Tang, and Xiaowei Zhan \*

**Table S1.** The photovoltaic parameters for inverted devices with structure of ITO/PEIE/PTB7-Th:PC<sub>71</sub>BM/composite anode. The average values and standard deviations are obtained based on 12 devices.

| Composite anode                       | $V_{oc}$<br>(V) | $J_{sc}$<br>(mA cm <sup>-2</sup> ) | FF          | PCE<br>(%) | $R_s$<br>( $\Omega$ cm <sup>2</sup> ) |
|---------------------------------------|-----------------|------------------------------------|-------------|------------|---------------------------------------|
| MoO <sub>3</sub> 4 nm/Ag              | 0.782±0.002     | 15.42±0.10                         | 0.639±0.010 | 7.69±0.20  | 270                                   |
| MoO <sub>3</sub> 5.5 nm/Ag            | 0.784±0.007     | 15.40±0.15                         | 0.657±0.012 | 7.93±0.15  | 287                                   |
| MoO <sub>3</sub> 7 nm/Ag              | 0.798±0.012     | 14.57±0.22                         | 0.626±0.013 | 7.28±0.16  | 301                                   |
| MoO <sub>3</sub> 8.5 nm/Ag            | 0.774±0.015     | 14.91±0.28                         | 0.628±0.027 | 7.25±0.19  | 312                                   |
| MoO <sub>3</sub> 10 nm/Ag             | 0.798±0.005     | 14.47±0.18                         | 0.662±0.007 | 7.64±0.19  | 317                                   |
| MoO <sub>3</sub> 11.5 nm/Ag           | 0.796±0.006     | 15.30±0.15                         | 0.653±0.017 | 7.95±0.18  | 300                                   |
| MoO <sub>3</sub> 13 nm/Ag             | 0.791±0.003     | 15.22±0.20                         | 0.648±0.020 | 7.84±0.20  | 312                                   |
| MoO <sub>3</sub> 4 nm/PEIE 5 nm/Ag    | 0.799±0.001     | 15.27±0.23                         | 0.666±0.017 | 8.14±0.20  | 262                                   |
| MoO <sub>3</sub> 5.5 nm/PEIE 5 nm/Ag  | 0.797±0.003     | 15.50±0.21                         | 0.674±0.009 | 8.34±0.18  | 284                                   |
| MoO <sub>3</sub> 7 nm/PEIE 5 nm/Ag    | 0.803±0.009     | 14.97±0.15                         | 0.665±0.020 | 7.98±0.19  | 293                                   |
| MoO <sub>3</sub> 8.5 nm/PEIE 5 nm/Ag  | 0.800±0.004     | 15.58±0.16                         | 0.675±0.015 | 8.42±0.20  | 259                                   |
| MoO <sub>3</sub> 10 nm//PEIE 5 nm/Ag  | 0.801±0.002     | 14.89±0.20                         | 0.665±0.011 | 7.92±0.15  | 278                                   |
| MoO <sub>3</sub> 11.5 nm/PEIE 5 nm/Ag | 0.801±0.007     | 15.01±0.17                         | 0.671±0.006 | 8.06±0.14  | 293                                   |
| MoO <sub>3</sub> 13 nm/PEIE 5 nm/Ag   | 0.796±0.003     | 15.19±0.18                         | 0.673±0.020 | 8.12±0.12  | 305                                   |

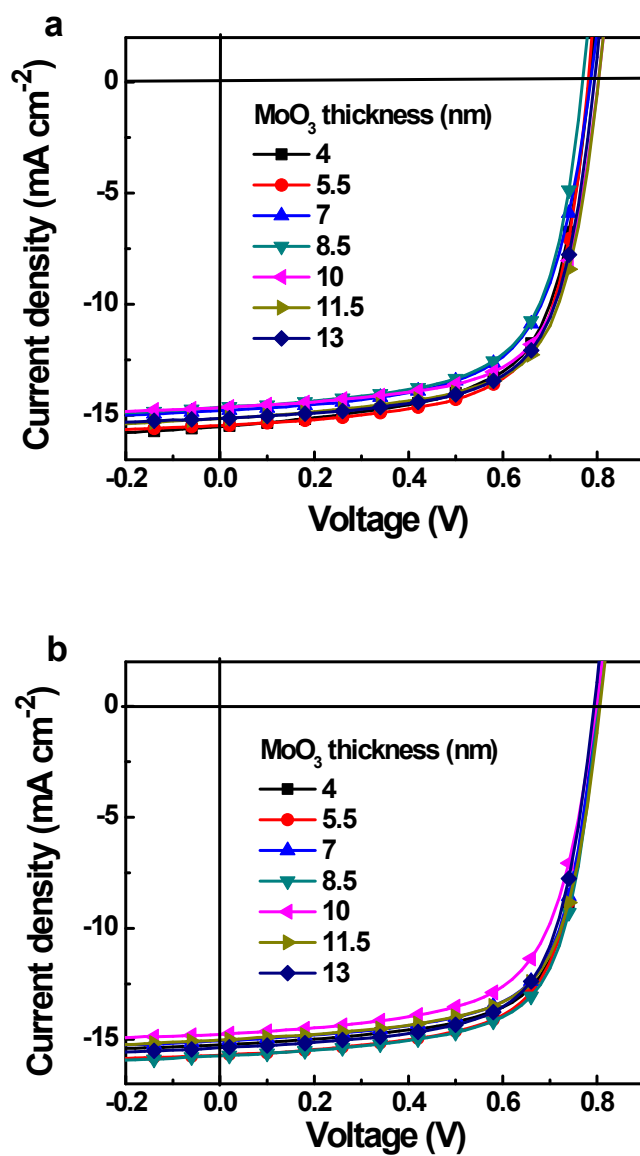

**Fig. S1** The  $J$ - $V$  characteristics of inverted OSCs with structure of ITO/PEIE/PTB7-Th:PC<sub>71</sub>BM/AC at various MoO<sub>3</sub> thicknesses under illumination, where AC = MoO<sub>3</sub>/Ag (a) or MoO<sub>3</sub>/PEIE 5 nm/Ag (b).

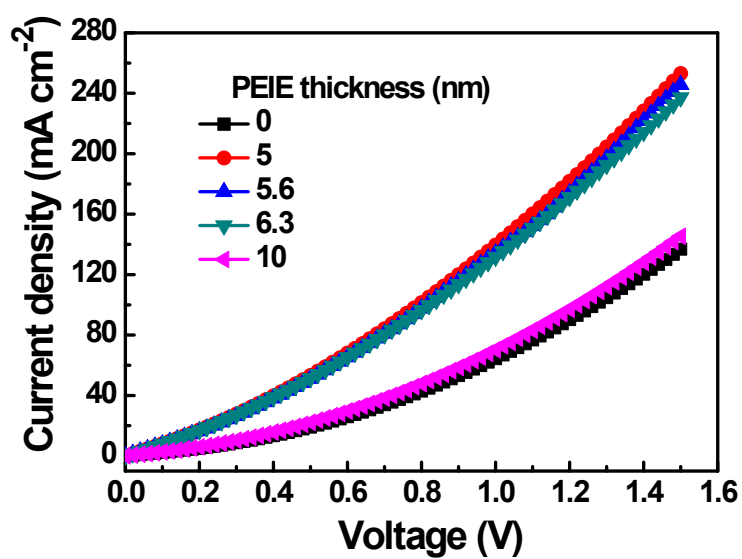

**Fig. S2** The dark  $J$ - $V$  characteristics of hole-only devices with structure of ITO/PEDOT:PSS/PTB7-Th:PC<sub>71</sub>BM/MoO<sub>3</sub> 10 nm/PEIE/Ag at various PEIE thicknesses.

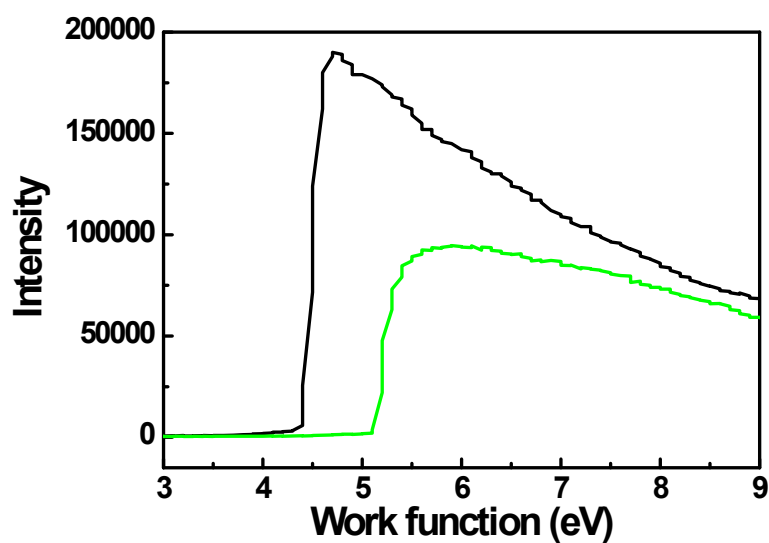

**Fig. S3** UPS spectra of the secondary cutoff regions for the glass/ITO/MoO<sub>3</sub> 10 nm (green line) and glass/ITO/MoO<sub>3</sub> 10 nm/PEIE 5 nm (black line).
